# Supplementary material for: A dual-response sensor based on NBD for the highly selective determination of sulfide in living cells and zebrafish
Source: Royal Society of Chemistry journal article supplement (doi:10.1039/c8nj06352d), 2019-01-01
Supplement: c8nj06352d1.pdf [file c8nj06352d1.pdf]

## Supporting Information

### **A dual-response sensor based on NBD for the highly selective determination of sulfide in living cells and zebrafish**

Ji Hye Kang,<sup>a</sup> Minuk Yang,<sup>a</sup> Dongju Yun,<sup>a</sup> Jiyeon Han,<sup>b</sup> Hyojin Lee,<sup>c</sup> Mi Hee Lim,<sup>b</sup> Ki-Tae Kim,<sup>c\*</sup> Cheal Kim<sup>a\*</sup>

*<sup>a</sup>Department of Fine Chemistry and Department of Interdisciplinary Bio IT Materials, Seoul National University of Science and Technology, Seoul 139-743, Korea. Fax: +82-2-973-9149; Tel: +82-2-970-6693; E-mail: [chealkim@seoultech.ac.kr](mailto:chealkim@seoultech.ac.kr)*

*<sup>b</sup>Department of Chemistry, Korea Advanced Institute of Science and Technology (KAIST), Daejeon 34141, Korea*

*<sup>c</sup>Department of Environmental Engineering, Seoul National University of Science and Technology, Seoul 139-743, Korea. Tel: +82-2-970-6642; E-mail: [ktkim@seoultech.ac.kr](mailto:ktkim@seoultech.ac.kr)*

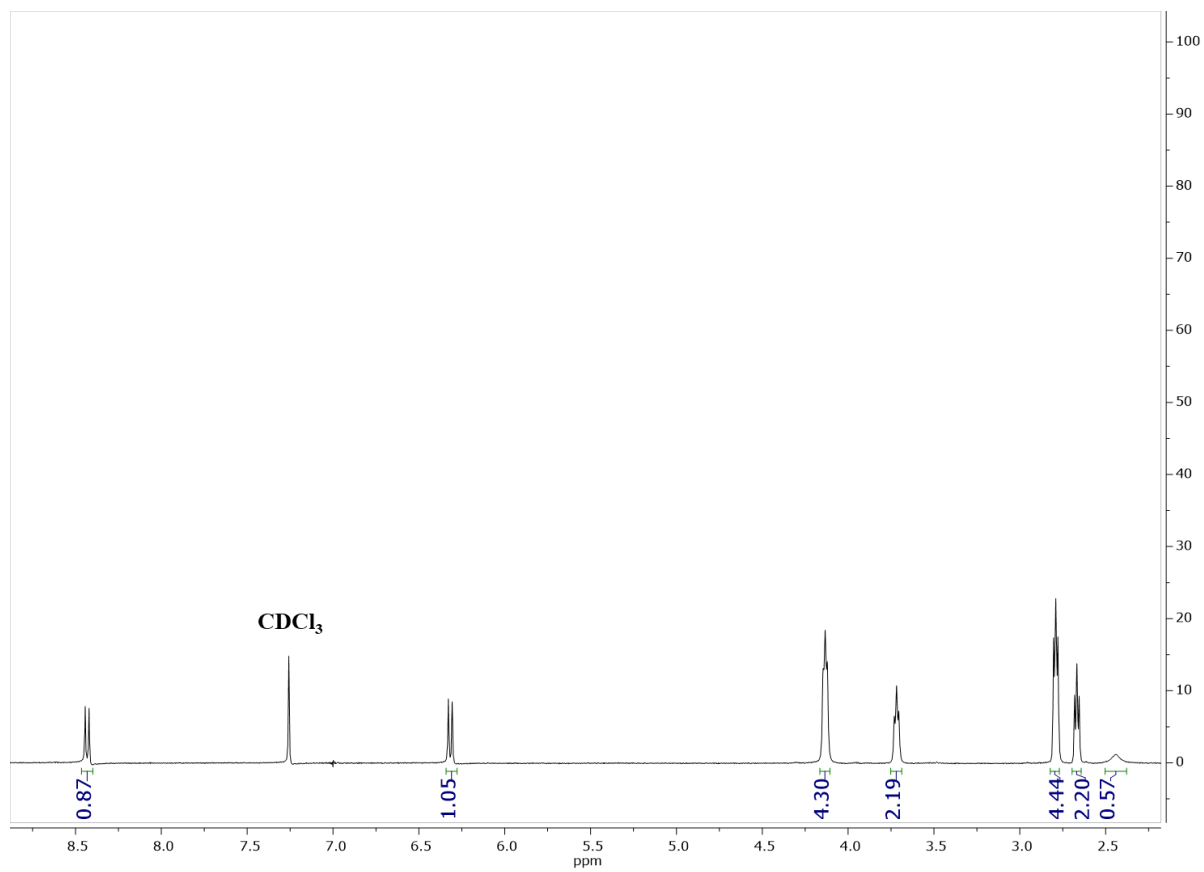

**Fig. S1**  $^1\text{H}$  NMR spectrum of **1-NO<sub>2</sub>**.

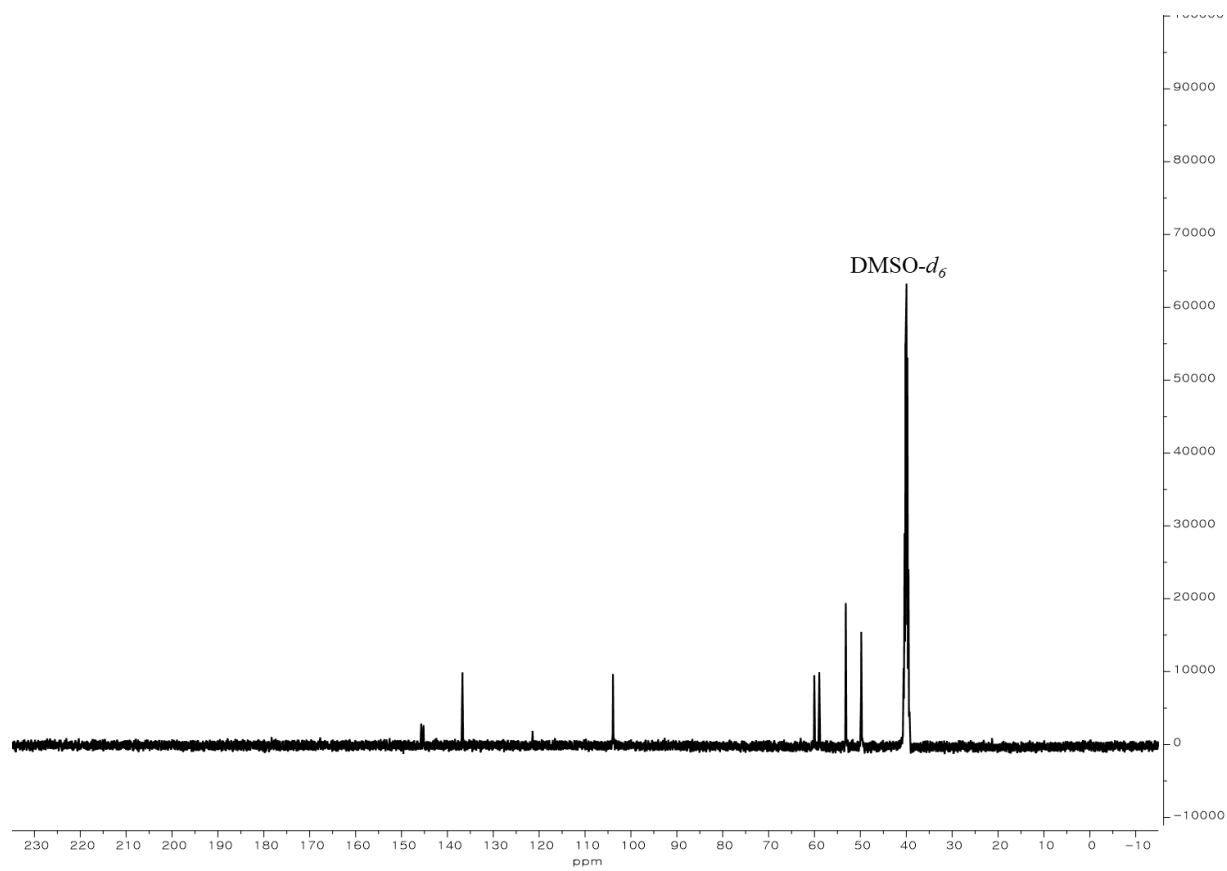

**Fig. S2**  $^{13}\text{C}$  NMR spectrum of 1-NO<sub>2</sub>.

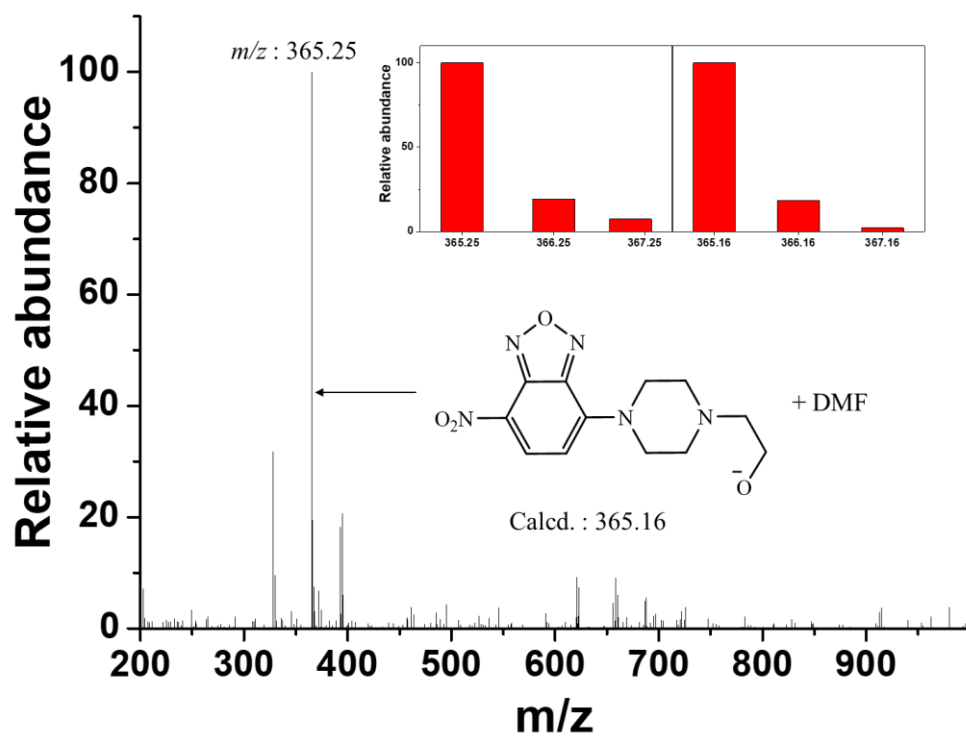

**Fig. S3** Negative-ion mass spectrum of 1-NO<sub>2</sub> (0.1 mM).

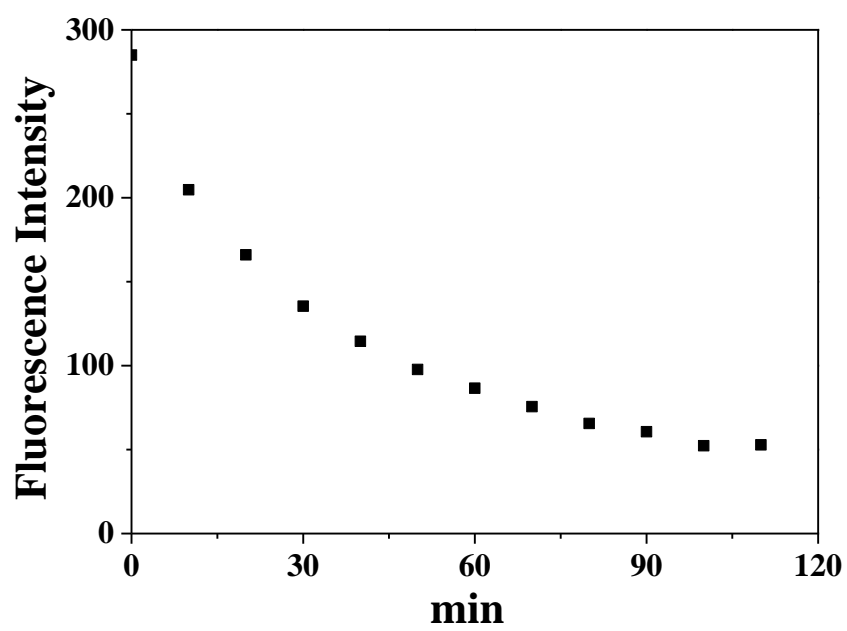

**Fig. S4** Reaction time (at 540 nm) of **1-NO<sub>2</sub>** (20  $\mu$ M) with **S<sup>2-</sup>** (8 equiv).

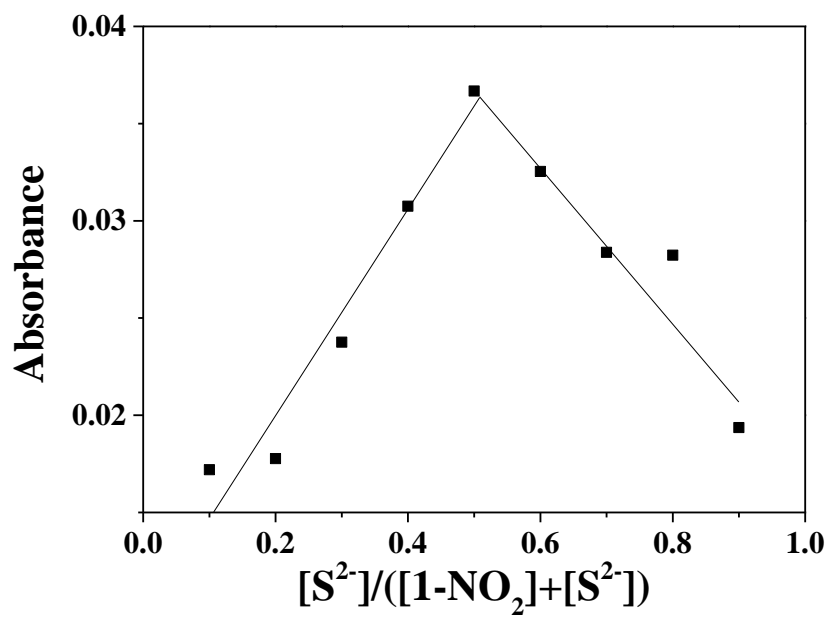

**Fig. S5** Job plot for interaction ratio of 1-NO<sub>2</sub> with S<sup>2-</sup>. The total concentration of 1-NO<sub>2</sub> with S<sup>2-</sup> was 50 μM.

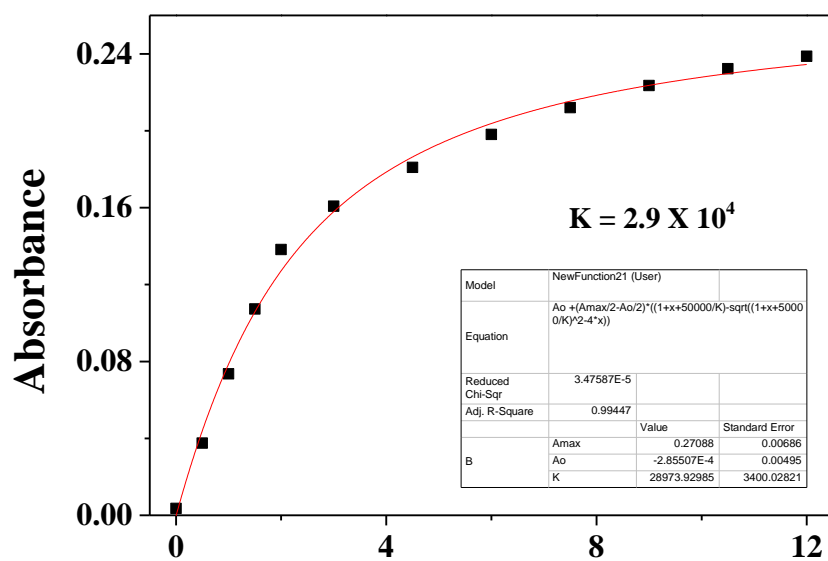

**Fig. S6** The association value of 1-NO<sub>2</sub> toward S<sup>2-</sup> by using the non-linear fitting equation based on UV-vis titration at 558 nm.

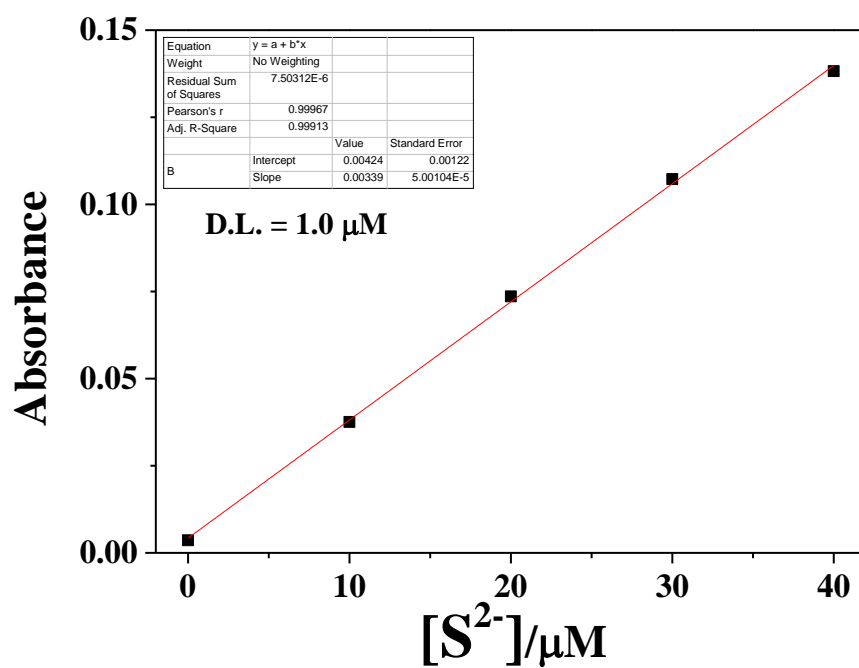

**Fig. S7** Determination of the detection limit of 1-NO<sub>2</sub> (20 μM) for S<sup>2-</sup> based on change of absorbance at 558 nm.



(a)

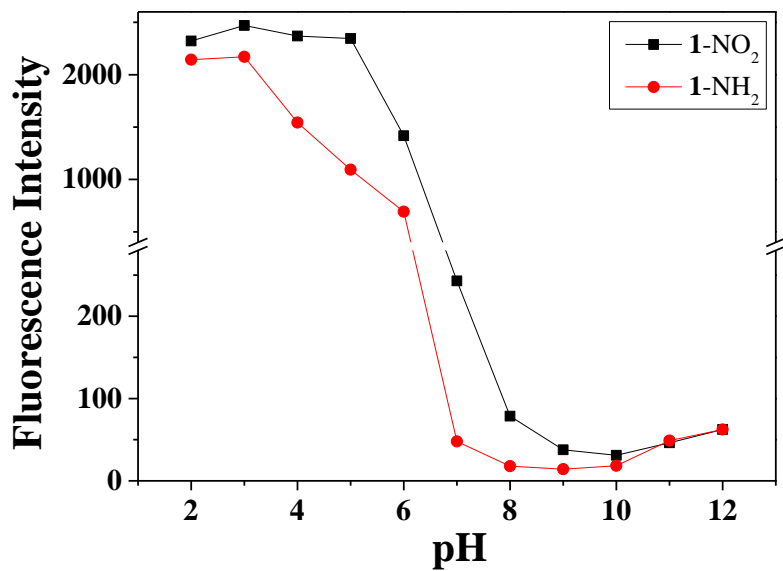

(b)

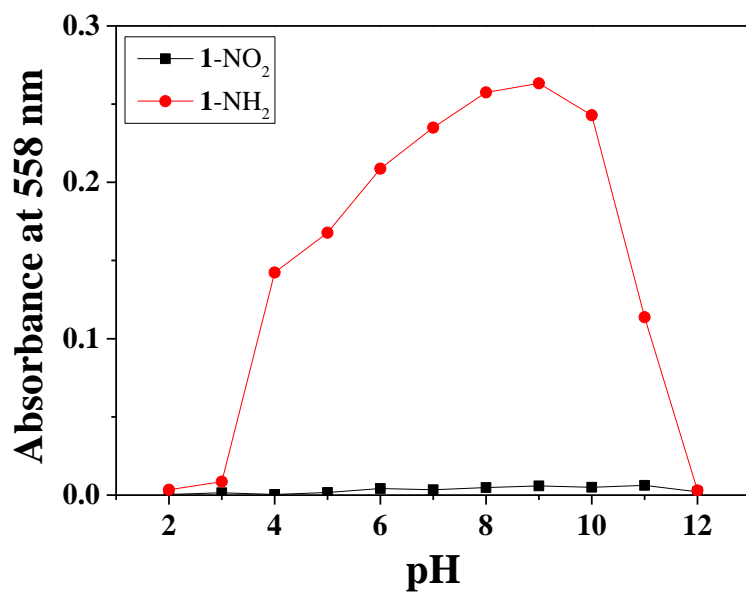

**Fig. S8** (a) Fluorescence intensities (at 540 nm) and (b) absorbance (at 558 nm) of 1-NO<sub>2</sub> (20  $\mu$ M) and the reduced form 1-NH<sub>2</sub>, respectively, at pH range of 2-12.

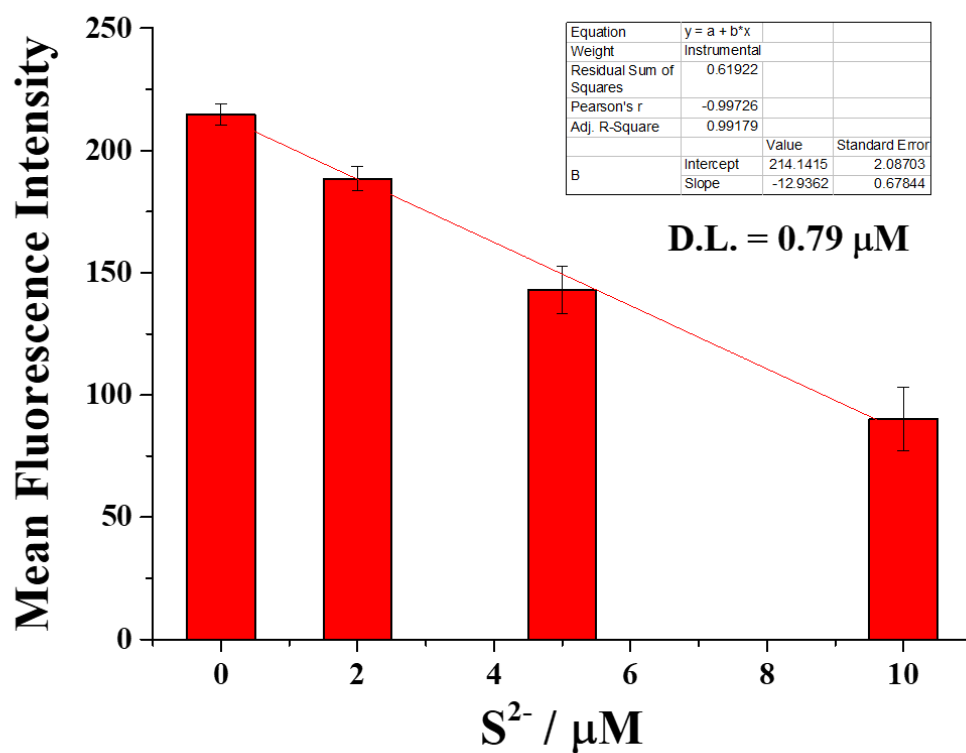

Fig. S9 Quantification of mean fluorescence intensity in Fig. 6 (a<sub>4</sub>, b<sub>4</sub>, c<sub>4</sub>, d<sub>4</sub>).

(a)

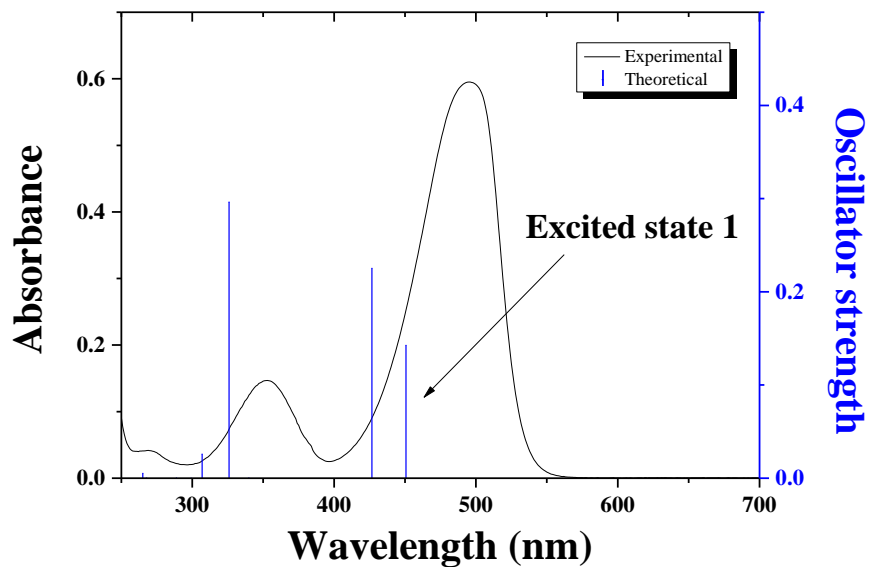

(b)

| Excited state 1 | Wavelength (nm) | Percent (%) | Main character | Oscillator strength |
|-----------------|-----------------|-------------|----------------|---------------------|
| H → L           | 450.72          | 65          | ICT            | 0.1427              |
| H-1 → L         |                 | 34          | ICT            |                     |

**Fig. S10** (a) The theoretical excitation energies and the experimental UV-vis spectrum of **1-NO<sub>2</sub>**. (b) The major electronic transition energy and molecular orbital contributions for **1-NO<sub>2</sub>** (H = HOMO and L = LUMO).

(a)

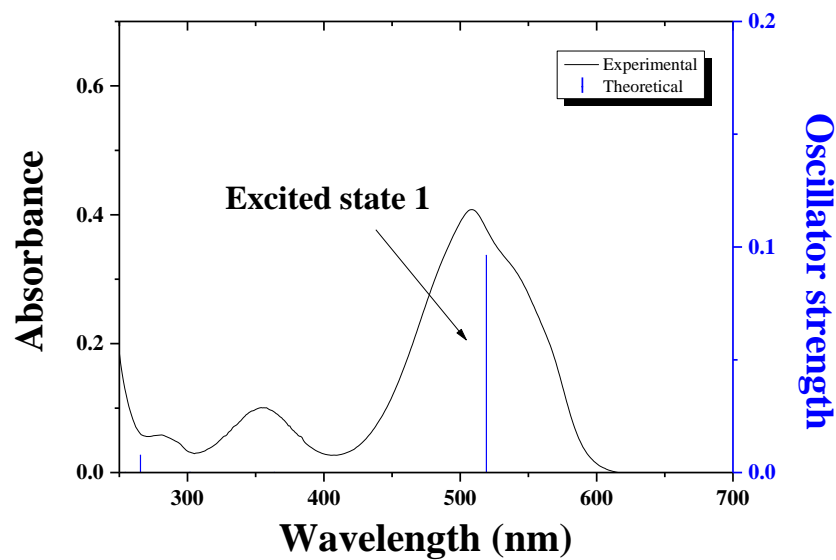

(b)

| Excited state 1 | Wavelength (nm) | Percent (%) | Main character | Oscillator strength |
|-----------------|-----------------|-------------|----------------|---------------------|
| H → L           | 519.19          | 99          | ICT            | 0.0963              |

**Fig. S11** (a) The theoretical excitation energies and the experimental UV-vis spectrum of the reduced form **1-NH<sub>2</sub>**. (b) The major electronic transition energies and molecular orbital contributions of the reduced form **1-NH<sub>2</sub>** (H = HOMO and L = LUMO).

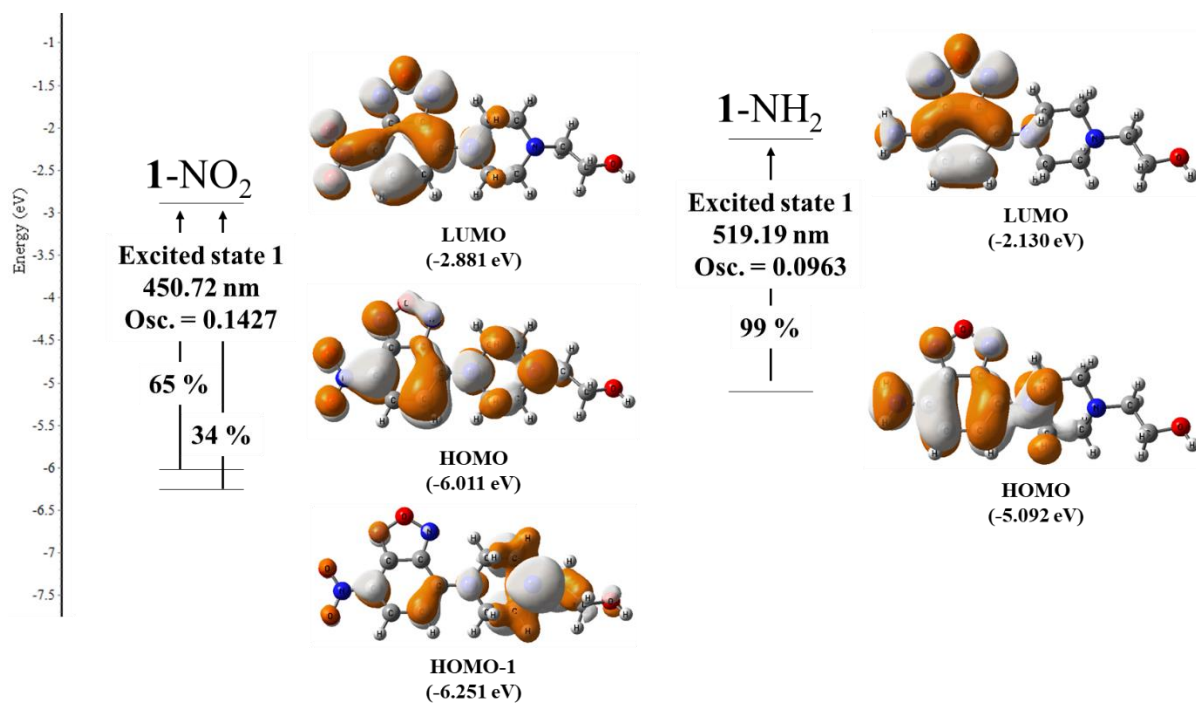

**Fig. S12** Molecular orbital diagrams of **1-NO<sub>2</sub>** and the reduced form **1-NH<sub>2</sub>** using TD-DFT.
